# Supplementary material for: Bright daytime light enhances circadian amplitude in a diurnal mammal
Source: PubMed Central journal article supplement (PMC8179182; doi:10.1073/pnas.2100094118), 2021-05-24
Supplement: pnas.2100094118.sapp.pdf [file pnas.2100094118.sapp.pdf]

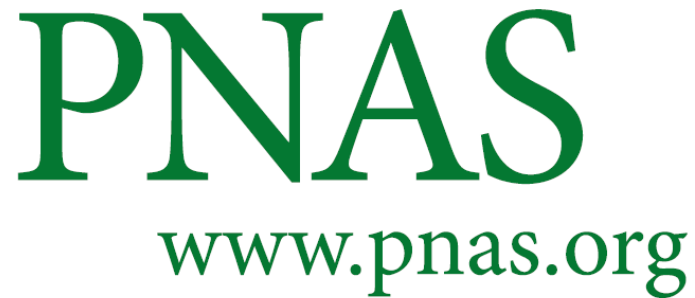

**Supplementary Information for**

**Bright daytime light enhances circadian amplitude  
in a diurnal mammal**

Beatriz Bano-Otalora, Franck Martial, Court Harding,  
David A. Bechtold, Annette E. Allen, Timothy M. Brown,  
Mino D. C. Belle, Robert J. Lucas\*

\*Corresponding author: Robert J. Lucas

Email: [robert.lucas@manchester.ac.uk](mailto:robert.lucas@manchester.ac.uk)

**This PDF file includes:**

Figure S1  
Table S1

**Supplementary Information**

### Supplementary Figure S1

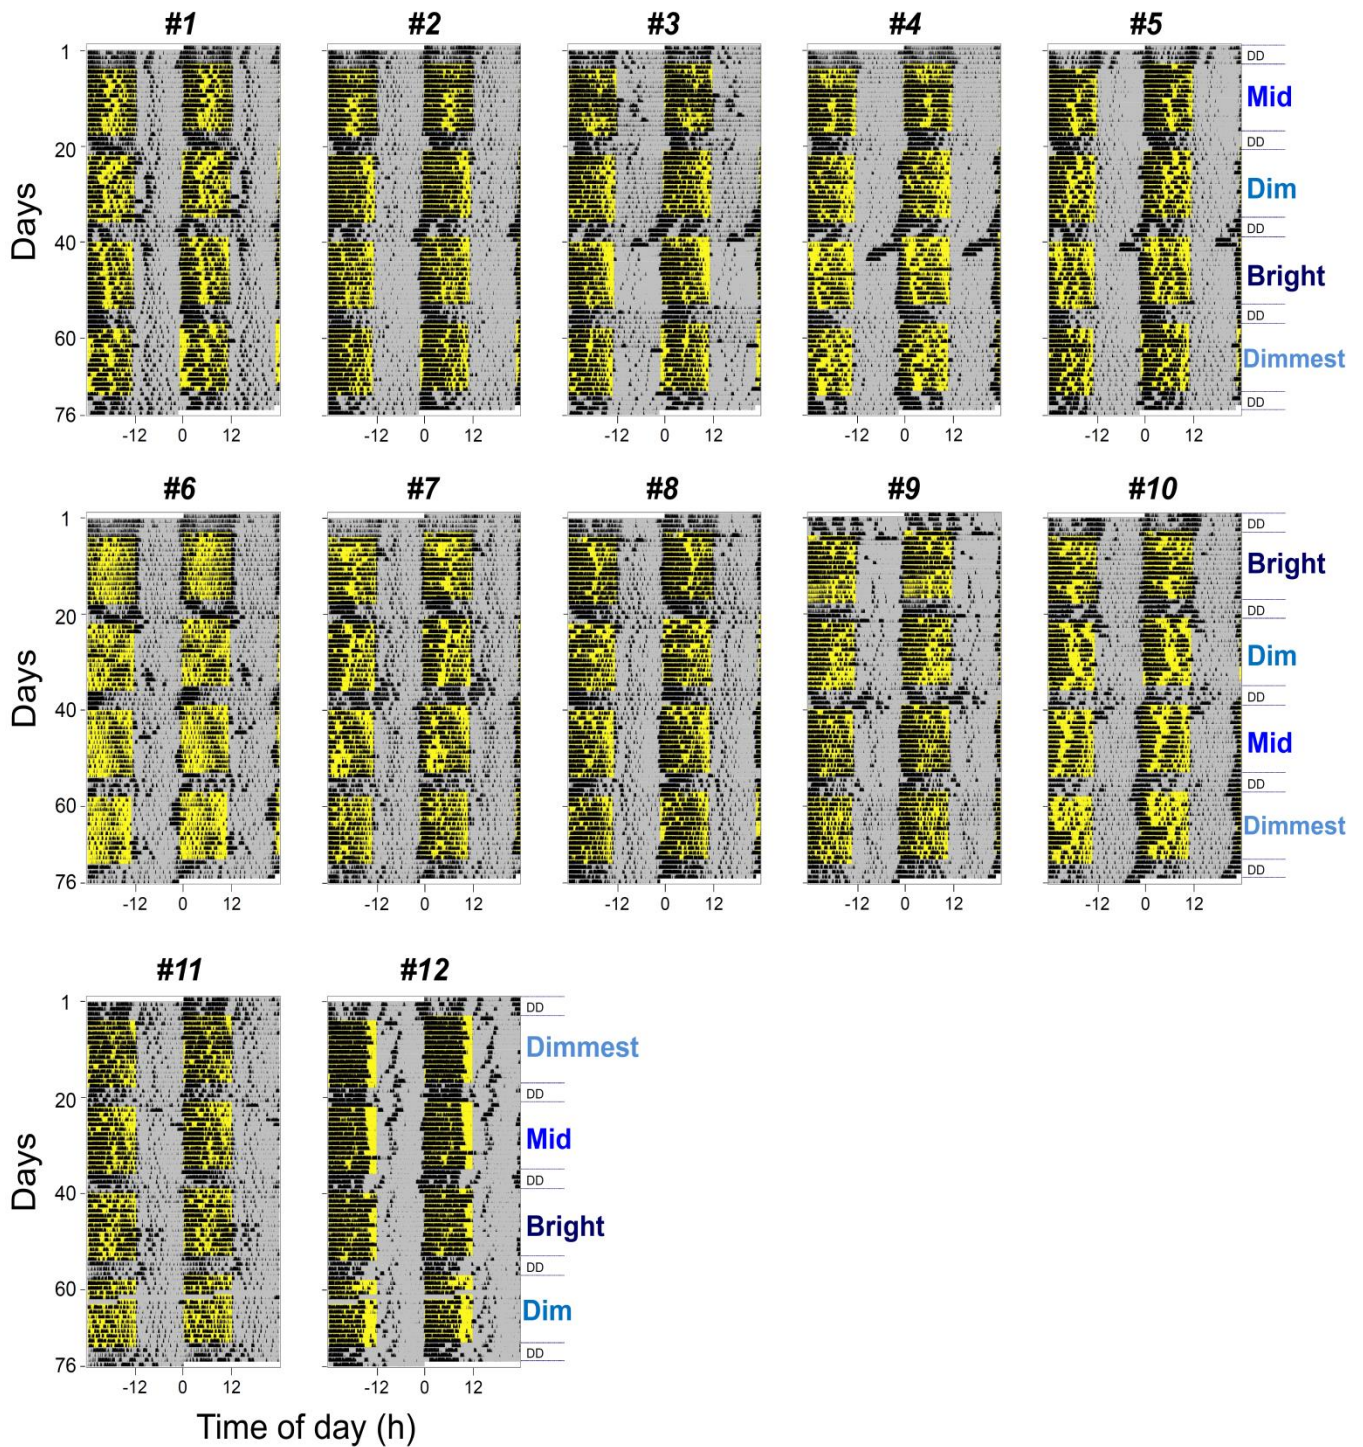

**Fig. S1. Impact of increasing daytime light intensity on activity rhythms in *Rhabdomys pumilio*.** Double-plotted actograms of general activity for a total of 12 animals under different lighting conditions, over a period of 2.5 months. Time of light exposure is indicated in yellow, and intensity of the light is shown on the left. Entrainment to 12:12 LD cycle at each irradiance ran for 2 weeks followed by 4 days in constant darkness (DD).

## Supplementary Table S1

**Table S1. Behavioral and physiological rhythms under different daytime irradiances.**

| n=12                       | Log Mel Effective photon flux/cm <sup>2</sup> /s | Dimmest<br>12.77 | Dim<br>12.95     | Mid<br>13.66     | Bright<br>14.80  | Is slope significantly non-zero? |
|----------------------------|--------------------------------------------------|------------------|------------------|------------------|------------------|----------------------------------|
| General Activity           | Mean Activity-Light                              | 390.40 ± 26.50   | 343.70 ± 16.08   | 392.50 ± 26.01   | 368.10 ± 20.39   | 0.997                            |
|                            | Mean Activity-Dark                               | 68.53 ± 7.14     | 69.21 ± 9.42     | 60.98 ± 7.26     | 73.73 ± 11.29    | 0.708                            |
|                            | Mean-24h                                         | 229.50 ± 11.99   | 206.50 ± 8.68    | 226.80 ± 12.05   | 220.90 ± 11.21   | 0.885                            |
|                            | % Diurnality                                     | 84.130 ± 2.614   | 83.300 ± 2.039   | 85.740 ± 2.202   | 83.350 ± 2.501   | 0.934                            |
|                            | Day-to day Reproducibility                       | 0.668 ± 0.037    | 0.638 ± 0.042    | 0.739 ± 0.031    | 0.718 ± 0.030    | 0.128                            |
|                            | Intradaily-Variability                           | 0.512 ± 0.057    | 0.542 ± 0.057    | 0.439 ± 0.057    | 0.446 ± 0.051    | 0.219                            |
| Wheel Running Activity     | Mean Activity-Light                              | 684.90 ± 71.64   | 598.60 ± 69.28   | 542.70 ± 77.12   | 625.60 ± 107.20  | 0.768                            |
|                            | Mean Activity-Dark                               | 39.13 ± 12.58    | 30.54 ± 12.31    | 33.94 ± 9.20     | 60.13 ± 13.97    | 0.113                            |
|                            | Mean-24h                                         | 362.00 ± 36.60   | 314.50 ± 35.83   | 288.30 ± 39.67   | 342.90 ± 53.33   | 0.952                            |
|                            | Total Activity-Light                             | 16438.0 ± 1719.0 | 14365.0 ± 1663.0 | 13025.0 ± 1851.0 | 15015.0 ± 2573.0 | 0.768                            |
|                            | Total Activity-Dark                              | 939.2 ± 302.0    | 732.9 ± 295.4    | 814.6 ± 220.7    | 1443.0 ± 335.2   | 0.113                            |
|                            | Total Activity -24h                              | 17377.0 ± 1757.0 | 15098.0 ± 1720.0 | 13840.0 ± 1904.0 | 16458.0 ± 2560.0 | 0.952                            |
|                            | % Diurnality                                     | 91.930 ± 3.675   | 94.920 ± 1.820   | 90.950 ± 4.215   | 87.130 ± 4.366   | 0.175                            |
| Day-to day Reproducibility | 0.648 ± 0.039                                    | 0.621 ± 0.058    | 0.628 ± 0.036    | 0.646 ± 0.029    | 0.867            |                                  |
| Intradaily-Variability     | 0.512 ± 0.103                                    | 0.466 ± 0.059    | 0.498 ± 0.059    | 0.534 ± 0.077    | 0.661            |                                  |
| Body Temperature           | Mean-Light                                       | 37.98 ± 0.11     | 37.92 ± 0.09     | 38.12 ± 0.10     | 38.16 ± 0.11     | 0.090                            |
|                            | Mean-Dark                                        | 35.62 ± 0.09     | 35.64 ± 0.11     | 35.57 ± 0.07     | 35.59 ± 0.08     | 0.725                            |
|                            | Mean-24h                                         | 36.80 ± 0.08     | 36.78 ± 0.09     | 36.85 ± 0.07     | 36.88 ± 0.08     | 0.364                            |
|                            | Day-to day Reproducibility                       | 0.782 ± 0.025    | 0.781 ± 0.026    | 0.840 ± 0.016    | 0.844 ± 0.010    | <b>0.012</b>                     |
| Intradaily-Variability     | 0.340 ± 0.027                                    | 0.346 ± 0.026    | 0.275 ± 0.024    | 0.259 ± 0.017    | <b>0.005</b>     |                                  |
| Sustained Immobility       | Mean-Light                                       | 0.264 ± 0.029    | 0.265 ± 0.018    | 0.212 ± 0.027    | 0.200 ± 0.016    | <b>0.020</b>                     |
|                            | Mean-Dark                                        | 0.768 ± 0.012    | 0.751 ± 0.022    | 0.771 ± 0.021    | 0.768 ± 0.027    | 0.768                            |
|                            | Mean-24h                                         | 0.516 ± 0.011    | 0.508 ± 0.015    | 0.491 ± 0.016    | 0.484 ± 0.016    | 0.098                            |
|                            | Day-to day Reproducibility                       | 0.639 ± 0.035    | 0.620 ± 0.031    | 0.743 ± 0.029    | 0.745 ± 0.022    | <b>0.002</b>                     |
|                            | Intradaily-Variability                           | 0.657 ± 0.056    | 0.692 ± 0.057    | 0.506 ± 0.061    | 0.508 ± 0.052    | <b>0.017</b>                     |

Data are expressed as mean ± SEM (n=12); Significant p values (p<0.05) are in bold.
